# Supplementary material for: A phen–terpy conjugate whose chelate coordination axes are orthogonal to one another and its zinc complex
Source: Royal Society of Chemistry journal article supplement (doi:10.1039/b511762c), 2005-12-02

# Supplementary Material (ESI) for New Journal of Chemistry  
# This journal is © The Royal Society of Chemistry and  
# The Centre National de la Recherche Scientifique, 2005

### Structure and atom numbering for Phen-terpy conjugate **1**

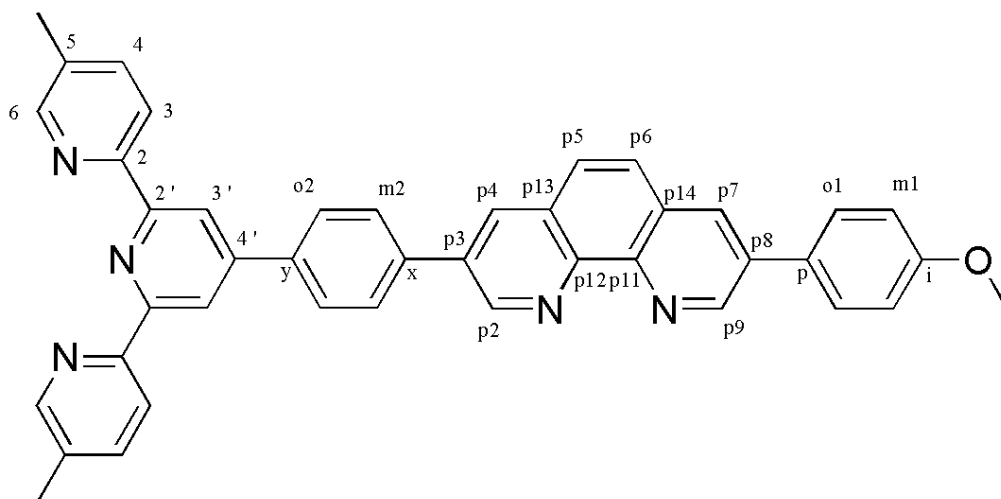

Supplement: b511762c.pdf [file b511762c.pdf]
